# Supplementary material for: IL-17E synergizes with EGF and confers in vitro resistance to EGFR-targeted therapies in TNBC cells
Source: PubMed Central journal article supplement (PMC5288192; doi:10.18632/oncotarget.10804), 2016-07-23
Supplement: oncotarget-07-53350-s001.pdf [file oncotarget-07-53350-s001.pdf]

## IL-17E synergizes with EGF and confers *in vitro* resistance to EGFR-targeted therapies in TNBC cells

### Supplementary Materials

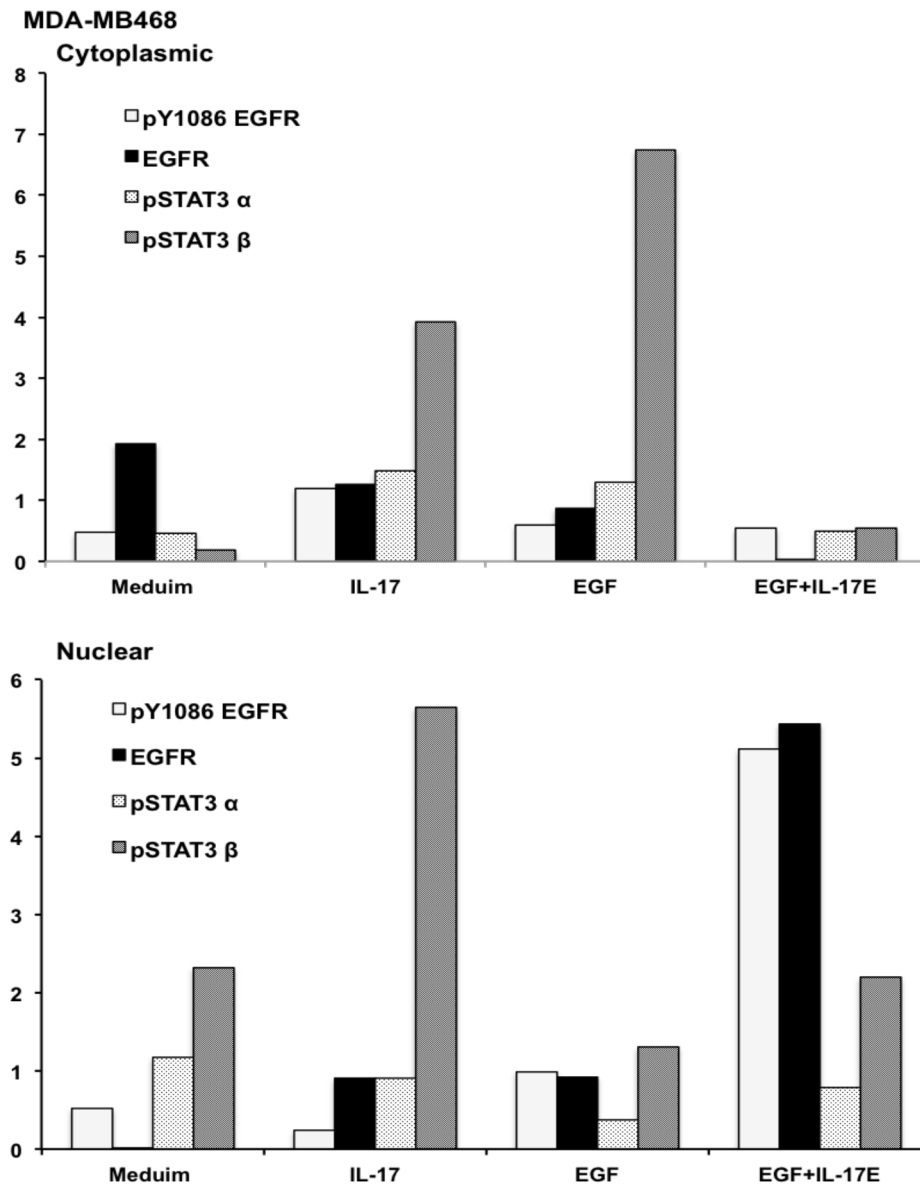

**Supplementary Figure S1: IL-17E co-translocates pEGFR and pSTAT3 to the nucleus.** MDA-MB468 cells were stimulated with IL-17E (10 ng/ml), EGF (10 ng/ml) or a combination of both. The translocation of EGFR, STAT3 $\alpha/\beta$ , and their phosphorylated counterparts from the cytoplasm to the nucleus was assessed by Western blotting using specific antibodies. Densitometry quantification of pY1086 EGFR, EGFR, and pSTAT3 $\alpha/\beta$  shown in the representative blots of Figure 5A is expressed as ratios between pY1086 EGFR, EGFR, and pSTAT3 $\alpha/\beta$  and bactin (cytoplasmic) or H3 histone (nuclear).

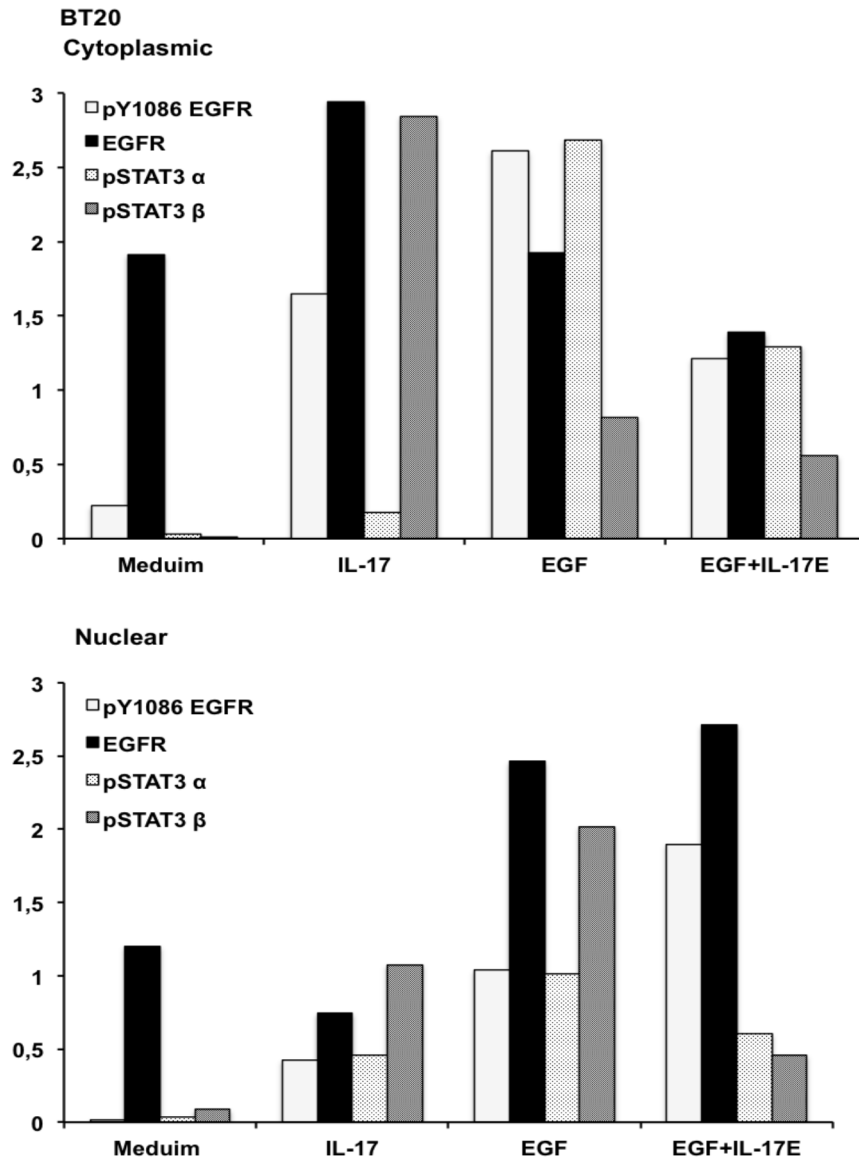

**Supplementary Figure S2: IL-17E co-translocates pEGFR and pSTAT3 to the nucleus.** BT20 cells were stimulated with IL-17E (10 ng/ml), EGF (10 ng/ml) or a combination of both. The translocation of EGFR, STAT3 $\alpha/\beta$ , and their phosphorylated counterparts from the cytoplasm to the nucleus was assessed by Western blotting using specific antibodies. Densitometry quantification of pY1086 EGFR, EGFR, and pSTAT3 $\alpha/\beta$  shown in the representative blots of Figure 5A is expressed as ratios between pY1086 EGFR, EGFR, and pSTAT3 $\alpha/\beta$  and bactin (cytoplasmic) or H3 histone (nuclear).
